# Supplementary material
Source: PubMed Central journal article supplement (PMC3754757)
Supplement: JB.00665-13_zjb999092782so1.pdf [file JB.00665-13_zjb999092782so1.pdf]

| <i>P. syringae</i> containing <i>mcb</i> operon                         | <i>P. syringae</i> that do not contain <i>mcb</i> operon             |
|-------------------------------------------------------------------------|----------------------------------------------------------------------|
| <i>P. syringae</i> pv. <i>glycinea</i> str. B076<br>(NZ_AEGG01000085)   | <i>P. syringae</i> pv. <i>tomato</i> str. DC3000<br>(NC_004578)      |
| <i>P. syringae</i> pv. <i>glycinea</i> str. race 4<br>(ADWY01001248)    | <i>P. syringae</i> pv. <i>syringae</i> str. B728a<br>(CP000075)      |
| <i>P. syringae</i> pv. <i>aesculi</i> str. NCPPB 3681<br>(ACXS01000133) | <i>P. syringae</i> pv. <i>phaseolicola</i> str. 1448A<br>(NC_005773) |

**Table S1. *P. syringae* strains with and without *mcb* operons.** Fully or partially sequenced *P. syringae* strains that, at the time of this writing, contain an entire *mcb* operon (*mcbABCDEFG*) are listed in the left-hand side of the table along with GenBank accession numbers. Fully sequenced strains that lack *mcb* genes are listed on the right hand side.



# Mascot Search Results

## Peptide View

MS/MS Fragmentation of **LGGSCGGQGGGCGGGGCSGGNGGSGGS**

Found in **McbA\_Psg\_tev**, McbA\_Psg\_tev

Match to Query 1: 2301.492724 from(2302.500000,1+) index(0)

Data file DATA.TXT

Click mouse within plot area to zoom in by factor of two about that point

Or,   to  Da

Label all possible matches  Label matches used for scoring

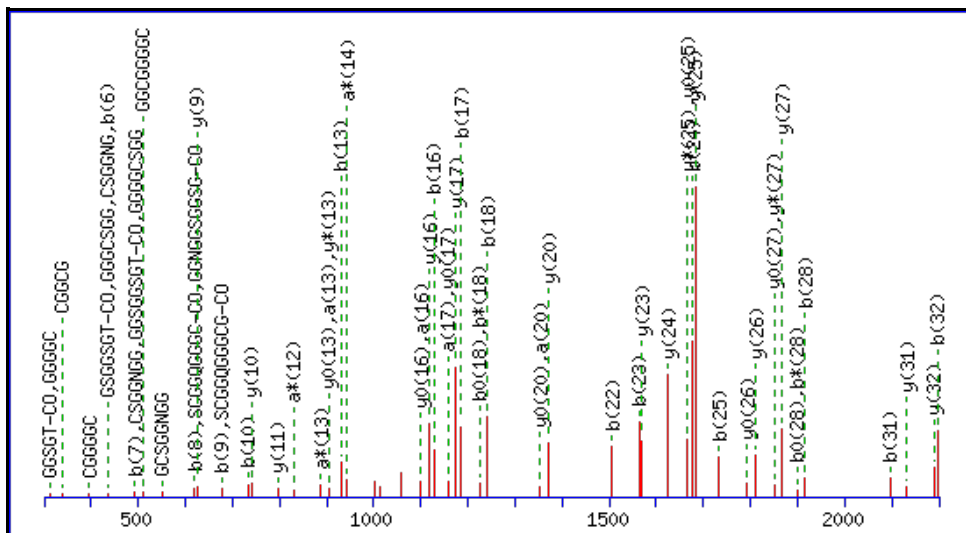

Monoisotopic mass of neutral peptide  $M_r(\text{calc})$ : 2301.6605

Variable modifications:

S4 : Oxazole S (S)

C5 : Thiazole (C)

C12 : Thiazole (C)

C15 : Thiazole (C)

C20 : Thiazole (C)

S21 : Oxazole S (S)

S27 : Oxazole S (S)

S30 : Oxazole S (S)

Ions Score: 150 **Expect:** 6.9e-014

Matches : 85/767 fragment ions using 49 most intense peaks ([help](#))

| #  | Immon.   | a               | a*              | a <sup>0</sup> | b               | b*       | b <sup>0</sup> | Seq. | y                | y*               | y <sup>0</sup>   | #  |
|----|----------|-----------------|-----------------|----------------|-----------------|----------|----------------|------|------------------|------------------|------------------|----|
| 1  | 86.0964  | 86.0964         |                 |                | 114.0913        |          |                | L    |                  |                  |                  | 33 |
| 2  | 30.0338  | 143.1179        |                 |                | 171.1128        |          |                | G    | <b>2189.5835</b> | 2172.5569        | 2171.5729        | 32 |
| 3  | 30.0338  | 200.1394        |                 |                | 228.1343        |          |                | G    | <b>2132.5620</b> | 2115.5355        | 2114.5514        | 31 |
| 4  | 40.0182  | 267.1452        |                 | 249.1346       | 295.1401        |          | 277.1295       | S    | 2075.5405        | 2058.5140        | 2057.5300        | 30 |
| 5  | 55.9953  | 350.1281        |                 | 332.1176       | 378.1231        |          | 360.1125       | C    | 2008.5347        | 1991.5082        | 1990.5242        | 29 |
| 6  | 30.0338  | 407.1496        |                 | 389.1390       | <b>435.1445</b> |          | 417.1340       | G    | 1925.5518        | 1908.5252        | 1907.5412        | 28 |
| 7  | 30.0338  | 464.1711        |                 | 446.1605       | <b>492.1660</b> |          | 474.1554       | G    | <b>1868.5303</b> | <b>1851.5037</b> | <b>1850.5197</b> | 27 |
| 8  | 101.0709 | 592.2296        | 575.2031        | 574.2191       | <b>620.2246</b> | 603.1980 | 602.2140       | Q    | <b>1811.5088</b> | 1794.4823        | <b>1793.4983</b> | 26 |
| 9  | 30.0338  | 649.2511        | 632.2246        | 631.2405       | <b>677.2460</b> | 660.2195 | 659.2355       | G    | <b>1683.4502</b> | <b>1666.4237</b> | <b>1665.4397</b> | 25 |
| 10 | 30.0338  | 706.2726        | 689.2460        | 688.2620       | <b>734.2675</b> | 717.2409 | 716.2569       | G    | <b>1626.4288</b> | 1609.4022        | 1608.4182        | 24 |
| 11 | 30.0338  | 763.2940        | 746.2675        | 745.2835       | 791.2889        | 774.2624 | 773.2784       | G    | <b>1569.4073</b> | 1552.3808        | 1551.3968        | 23 |
| 12 | 55.9953  | 846.2770        | <b>829.2505</b> | 828.2664       | 874.2719        | 857.2454 | 856.2614       | C    | 1512.3859        | 1495.3593        | 1494.3753        | 22 |
| 13 | 30.0338  | <b>893.2895</b> | <b>886.2710</b> | 885.2870       | <b>931.2924</b> | 914.2769 | 913.2929       | C    | 1420.4020        | 1410.2762        | 1411.2922        | 21 |

|    |         |                  |                 |           |                  |                  |                  |   |                  |                 |                  |    |
|----|---------|------------------|-----------------|-----------|------------------|------------------|------------------|---|------------------|-----------------|------------------|----|
| 13 | 30.0338 | <b>903.2985</b>  | <b>886.2719</b> | 885.2879  | <b>951.2954</b>  | 914.2668         | 915.2828         | G | 1429.4029        | 1412.5705       | 1411.5925        | 21 |
| 14 | 30.0338 | 960.3199         | <b>943.2934</b> | 942.3094  | 988.3148         | 971.2883         | 970.3043         | G | <b>1372.3814</b> | 1355.3549       | <b>1354.3709</b> | 20 |
| 15 | 55.9953 | 1043.3029        | 1026.2764       | 1025.2923 | 1071.2978        | 1054.2713        | 1053.2873        | C | 1315.3600        | 1298.3334       | 1297.3494        | 19 |
| 16 | 30.0338 | <b>1100.3244</b> | 1083.2978       | 1082.3138 | <b>1128.3193</b> | 1111.2927        | 1110.3087        | G | 1232.3770        | 1215.3504       | 1214.3664        | 18 |
| 17 | 30.0338 | <b>1157.3458</b> | 1140.3193       | 1139.3353 | <b>1185.3407</b> | 1168.3142        | 1167.3302        | G | <b>1175.3555</b> | 1158.3290       | <b>1157.3450</b> | 17 |
| 18 | 30.0338 | 1214.3673        | 1197.3407       | 1196.3567 | <b>1242.3622</b> | <b>1225.3357</b> | <b>1224.3516</b> | G | <b>1118.3341</b> | 1101.3075       | <b>1100.3235</b> | 16 |
| 19 | 30.0338 | 1271.3888        | 1254.3622       | 1253.3782 | 1299.3837        | 1282.3571        | 1281.3731        | G | 1061.3126        | 1044.2860       | 1043.3020        | 15 |
| 20 | 55.9953 | <b>1354.3717</b> | 1337.3452       | 1336.3612 | 1382.3666        | 1365.3401        | 1364.3561        | C | 1004.2911        | 987.2646        | 986.2806         | 14 |
| 21 | 40.0182 | 1421.3775        | 1404.3510       | 1403.3670 | 1449.3725        | 1432.3459        | 1431.3619        | S | 921.3082         | <b>904.2816</b> | <b>903.2976</b>  | 13 |
| 22 | 30.0338 | 1478.3990        | 1461.3725       | 1460.3884 | <b>1506.3939</b> | 1489.3674        | 1488.3834        | G | 854.3023         | 837.2758        | 836.2918         | 12 |
| 23 | 30.0338 | 1535.4205        | 1518.3939       | 1517.4099 | <b>1563.4154</b> | 1546.3888        | 1545.4048        | G | <b>797.2809</b>  | 780.2543        | 779.2703         | 11 |
| 24 | 87.0553 | 1649.4634        | 1632.4368       | 1631.4528 | <b>1677.4583</b> | 1660.4318        | 1659.4477        | N | <b>740.2594</b>  | 723.2329        | 722.2489         | 10 |
| 25 | 30.0338 | 1706.4849        | 1689.4583       | 1688.4743 | <b>1734.4798</b> | 1717.4532        | 1716.4692        | G | <b>626.2165</b>  |                 | 608.2059         | 9  |
| 26 | 30.0338 | 1763.5063        | 1746.4798       | 1745.4958 | 1791.5012        | 1774.4747        | 1773.4907        | G | 569.1950         |                 | 551.1845         | 8  |
| 27 | 40.0182 | 1830.5121        | 1813.4856       | 1812.5016 | 1858.5071        | 1841.4805        | 1840.4965        | S | 512.1736         |                 | 494.1630         | 7  |
| 28 | 30.0338 | 1887.5336        | 1870.5071       | 1869.5230 | <b>1915.5285</b> | <b>1898.5020</b> | <b>1897.5180</b> | G | 445.1678         |                 | 427.1572         | 6  |
| 29 | 30.0338 | 1944.5551        | 1927.5285       | 1926.5445 | 1972.5500        | 1955.5234        | 1954.5394        | G | 388.1463         |                 | 370.1357         | 5  |
| 30 | 40.0182 | 2011.5609        | 1994.5343       | 1993.5503 | 2039.5558        | 2022.5292        | 2021.5452        | S | 331.1248         |                 | 313.1143         | 4  |
| 31 | 30.0338 | 2068.5823        | 2051.5558       | 2050.5718 | <b>2096.5773</b> | 2079.5507        | 2078.5667        | G | 264.1190         |                 | 246.1084         | 3  |
| 32 | 74.0600 | 2169.6300        | 2152.6035       | 2151.6195 | <b>2197.6249</b> | 2180.5984        | 2179.6144        | T | 207.0975         |                 | 189.0870         | 2  |
| 33 | 60.0444 |                  |                 |           |                  |                  |                  | S | 106.0499         |                 | 88.0393          | 1  |

| Seq      | ya       | yb              | Seq       | ya              | yb       | Seq        | ya              | yb       |
|----------|----------|-----------------|-----------|-----------------|----------|------------|-----------------|----------|
| GG       | 87.0553  | 115.0502        | GGG       | 154.0611        | 182.0560 | GGSC       | 237.0441        | 265.0390 |
| GGSCG    | 294.0655 | 322.0605        | GGSCGG    | 351.0870        | 379.0819 | GGSCGGQ    | 479.1456        | 507.1405 |
| GGSCGGQG | 536.1670 | 564.1620        | GGSCGGQGG | 593.1885        | 621.1834 | GGSCGGQGGG | 650.2100        | 678.2049 |
| GS       | 97.0396  | 125.0346        | GSC       | 180.0226        | 208.0175 | GSCG       | 237.0441        | 265.0390 |
| GSCGG    | 294.0655 | 322.0605        | GSCGGQ    | 422.1241        | 450.1190 | GSCGGQG    | 479.1456        | 507.1405 |
| GSCGGQGG | 536.1670 | 564.1620        | GSCGGQGGG | 593.1885        | 621.1834 | GSCGGQGGGC | <b>676.1715</b> | 704.1664 |
| SC       | 123.0011 | 150.9961        | SCG       | 180.0226        | 208.0175 | SCGG       | 237.0441        | 265.0390 |
| SCGGQ    | 365.1026 | 393.0976        | SCGGQG    | 422.1241        | 450.1190 | SCGGQGG    | 479.1456        | 507.1405 |
| SCGGQGGG | 536.1670 | 564.1620        | SCGGQGGGC | <b>619.1500</b> | 647.1449 | SCGGQGGGCG | <b>676.1715</b> | 704.1664 |
| CG       | 113.0168 | 141.0117        | CGG       | 170.0383        | 198.0332 | CGGQ       | 298.0968        | 326.0918 |
| CGGQG    | 355.1183 | 383.1132        | CGGQGG    | 412.1398        | 440.1347 | CGGQGGG    | 469.1612        | 497.1561 |
| CGGQGGGC | 552.1442 | 580.1391        | CGGQGGGCG | 609.1657        | 637.1606 | CGGQGGGCGG | 666.1871        | 694.1820 |
| GG       | 87.0553  | 115.0502        | GGQ       | 215.1139        | 243.1088 | GGQG       | 272.1353        | 300.1302 |
| GGQGG    | 329.1568 | 357.1517        | GGQGGG    | 386.1783        | 414.1732 | GGQGGGC    | 469.1612        | 497.1561 |
| GGQGGGCG | 526.1827 | 554.1776        | GGQGGGCGG | 583.2042        | 611.1991 | GGQGGGCGGC | 666.1871        | 694.1820 |
| GQ       | 158.0924 | 186.0873        | GQG       | 215.1139        | 243.1088 | GQGG       | 272.1353        | 300.1302 |
| GQGGG    | 329.1568 | 357.1517        | GQGGGC    | 412.1398        | 440.1347 | GQGGGCG    | 469.1612        | 497.1561 |
| GQGGGCGG | 526.1827 | 554.1776        | GQGGGCGGC | 609.1657        | 637.1606 | GQGGGCGGCG | 666.1871        | 694.1820 |
| QG       | 158.0924 | 186.0873        | QGG       | 215.1139        | 243.1088 | QGGG       | 272.1353        | 300.1302 |
| QGGGC    | 355.1183 | 383.1132        | QGGGCG    | 412.1398        | 440.1347 | QGGGCGG    | 469.1612        | 497.1561 |
| QGGGCGGC | 552.1442 | 580.1391        | QGGGCGGCG | 609.1657        | 637.1606 | QGGGCGGCGG | 666.1871        | 694.1820 |
| GG       | 87.0553  | 115.0502        | GGG       | 144.0768        | 172.0717 | GGGC       | 227.0597        | 255.0546 |
| GGGCG    | 284.0812 | <b>312.0761</b> | GGGCGG    | 341.1027        | 369.0976 | GGGCGGC    | 424.0856        | 452.0805 |
| GGGCGGCG | 481.1071 | <b>509.1020</b> | GGGCGGCGG | 538.1285        | 566.1235 | GGGCGGCGGG | 595.1500        | 623.1449 |

|             |          |          |             |          |          |             |          |          |
|-------------|----------|----------|-------------|----------|----------|-------------|----------|----------|
| GGGCGGCGGGG | 652.1715 | 680.1664 | GG          | 87.0553  | 115.0502 | GGC         | 170.0383 | 198.0332 |
| GGCG        | 227.0597 | 255.0546 | GGCGG       | 284.0812 | 312.0761 | GGCGGC      | 367.0642 | 395.0591 |
| GGCGGCG     | 424.0856 | 452.0805 | GGCGGCGG    | 481.1071 | 509.1020 | GGCGGCGGG   | 538.1285 | 566.1235 |
| GGCGGCGGGG  | 595.1500 | 623.1449 | GGCGGCGGGGC | 678.1330 | 706.1279 | GC          | 113.0168 | 141.0117 |
| GCG         | 170.0383 | 198.0332 | GCGG        | 227.0597 | 255.0546 | GCGGC       | 310.0427 | 338.0376 |
| GCGGCG      | 367.0642 | 395.0591 | GCGGCGG     | 424.0856 | 452.0805 | GCGGCGGG    | 481.1071 | 509.1020 |
| GCGGCGGGG   | 538.1285 | 566.1235 | GCGGCGGGGC  | 621.1115 | 649.1064 | GCGGCGGGGCS | 688.1173 | 716.1122 |
| CG          | 113.0168 | 141.0117 | CGG         | 170.0383 | 198.0332 | CGGC        | 253.0212 | 281.0161 |
| CGGCG       | 310.0427 | 338.0376 | CGGCGG      | 367.0642 | 395.0591 | CGGCGGG     | 424.0856 | 452.0805 |
| CGGCGGGG    | 481.1071 | 509.1020 | CGGCGGGGC   | 564.0901 | 592.0850 | CGGCGGGGCS  | 631.0959 | 659.0908 |
| CGGCGGGGCSG | 688.1173 | 716.1122 | GG          | 87.0553  | 115.0502 | GGC         | 170.0383 | 198.0332 |
| GGCG        | 227.0597 | 255.0546 | GGCGG       | 284.0812 | 312.0761 | GGCGGG      | 341.1027 | 369.0976 |
| GGCGGGG     | 398.1241 | 426.1190 | GGCGGGGC    | 481.1071 | 509.1020 | GGCGGGGCS   | 548.1129 | 576.1078 |
| GGCGGGGCSG  | 605.1344 | 633.1293 | GGCGGGGCSGG | 662.1558 | 690.1507 | GC          | 113.0168 | 141.0117 |
| GCG         | 170.0383 | 198.0332 | GCGG        | 227.0597 | 255.0546 | GCGGG       | 284.0812 | 312.0761 |
| GCGGGG      | 341.1027 | 369.0976 | GCGGGGC     | 424.0856 | 452.0805 | GCGGGGCS    | 491.0914 | 519.0863 |
| GCGGGGCSG   | 548.1129 | 576.1078 | GCGGGGCSGG  | 605.1344 | 633.1293 | CG          | 113.0168 | 141.0117 |
| CGG         | 170.0383 | 198.0332 | CGGG        | 227.0597 | 255.0546 | CGGGG       | 284.0812 | 312.0761 |
| CGGGGC      | 367.0642 | 395.0591 | CGGGGCS     | 434.0700 | 462.0649 | CGGGGCSG    | 491.0914 | 519.0863 |
| CGGGGCSGG   | 548.1129 | 576.1078 | CGGGGCSGGN  | 662.1558 | 690.1507 | GG          | 87.0553  | 115.0502 |
| GGG         | 144.0768 | 172.0717 | GGGG        | 201.0982 | 229.0931 | GGGGC       | 284.0812 | 312.0761 |
| GGGGCS      | 351.0870 | 379.0819 | GGGGCSG     | 408.1085 | 436.1034 | GGGGCSGG    | 465.1299 | 493.1248 |
| GGGGCSGGN   | 579.1729 | 607.1678 | GGGGCSGGNG  | 636.1943 | 664.1892 | GGGGCSGGNGG | 693.2158 | 721.2107 |
| GG          | 87.0553  | 115.0502 | GGG         | 144.0768 | 172.0717 | GGGC        | 227.0597 | 255.0546 |
| GGGCS       | 294.0655 | 322.0605 | GGGCSG      | 351.0870 | 379.0819 | GGGCSGG     | 408.1085 | 436.1034 |
| GGGCSGGN    | 522.1514 | 550.1463 | GGGCSGGNG   | 579.1729 | 607.1678 | GGGCSGGNGG  | 636.1943 | 664.1892 |
| GG          | 87.0553  | 115.0502 | GGC         | 170.0383 | 198.0332 | GGCS        | 237.0441 | 265.0390 |
| GGCSG       | 294.0655 | 322.0605 | GGCSGG      | 351.0870 | 379.0819 | GGCSGGN     | 465.1299 | 493.1248 |
| GGCSGGNG    | 522.1514 | 550.1463 | GGCSGGNGG   | 579.1729 | 607.1678 | GGCSGGNGGS  | 646.1787 | 674.1736 |
| GC          | 113.0168 | 141.0117 | GCS         | 180.0226 | 208.0175 | GCSG        | 237.0441 | 265.0390 |
| GCSGG       | 294.0655 | 322.0605 | GCSGGN      | 408.1085 | 436.1034 | GCSGGNG     | 465.1299 | 493.1248 |
| GCSGGNGG    | 522.1514 | 550.1463 | GCSGGNGGS   | 589.1572 | 617.1521 | GCSGGNGGSG  | 646.1787 | 674.1736 |
| CS          | 123.0011 | 150.9961 | CSG         | 180.0226 | 208.0175 | CSGG        | 237.0441 | 265.0390 |
| CSGGN       | 351.0870 | 379.0819 | CSGGNG      | 408.1085 | 436.1034 | CSGGNGG     | 465.1299 | 493.1248 |
| CSGGNGGS    | 532.1357 | 560.1307 | CSGGNGGSG   | 589.1572 | 617.1521 | CSGGNGGSGG  | 646.1787 | 674.1736 |
| SG          | 97.0396  | 125.0346 | SGG         | 154.0611 | 182.0560 | SGGN        | 268.1040 | 296.0989 |
| SGGNG       | 325.1255 | 353.1204 | SGGNGG      | 382.1470 | 410.1419 | SGGNGGS     | 449.1528 | 477.1477 |
| SGGNGGSG    | 506.1742 | 534.1691 | SGGNGGSGG   | 563.1957 | 591.1906 | SGGNGGSGGS  | 630.2015 | 658.1964 |
| SGGNGGSGGSG | 687.2230 | 715.2179 | GG          | 87.0553  | 115.0502 | GGN         | 201.0982 | 229.0931 |
| GGNG        | 258.1197 | 286.1146 | GGNGG       | 315.1411 | 343.1361 | GGNGGS      | 382.1470 | 410.1419 |
| GGNGGSG     | 439.1684 | 467.1633 | GGNGGSGG    | 496.1899 | 524.1848 | GGNGGSGGS   | 563.1957 | 591.1906 |
| GGNGGSGGSG  | 620.2172 | 648.2121 | GN          | 144.0768 | 172.0717 | GNG         | 201.0982 | 229.0931 |
| GNGG        | 258.1197 | 286.1146 | GNGGS       | 325.1255 | 353.1204 | GNGGSG      | 382.1470 | 410.1419 |
| GNGGSGG     | 439.1684 | 467.1633 | GNGGSGGS    | 506.1742 | 534.1691 | GNGGSGGSG   | 563.1957 | 591.1906 |
| GNGGSGGSGT  | 664.2434 | 692.2383 | NG          | 144.0768 | 172.0717 | NGG         | 201.0982 | 229.0931 |

|                 |          |          |                 |          |          |                  |          |          |
|-----------------|----------|----------|-----------------|----------|----------|------------------|----------|----------|
| <b>NGGS</b>     | 268.1040 | 296.0989 | <b>NGGSG</b>    | 325.1255 | 353.1204 | <b>NGGSGG</b>    | 382.1470 | 410.1419 |
| <b>NGGSGGS</b>  | 449.1528 | 477.1477 | <b>NGGSGGSG</b> | 506.1742 | 534.1691 | <b>NGGSGGSGT</b> | 607.2219 | 635.2168 |
| <b>GG</b>       | 87.0553  | 115.0502 | <b>GGS</b>      | 154.0611 | 182.0560 | <b>GGSG</b>      | 211.0826 | 239.0775 |
| <b>GGSGG</b>    | 268.1040 | 296.0989 | <b>GGSGGS</b>   | 335.1098 | 363.1048 | <b>GGSGGSG</b>   | 392.1313 | 420.1262 |
| <b>GGSGGSGT</b> | 493.1790 | 521.1739 | <b>GS</b>       | 97.0396  | 125.0346 | <b>GSG</b>       | 154.0611 | 182.0560 |
| <b>GSGG</b>     | 211.0826 | 239.0775 | <b>GSGGS</b>    | 278.0884 | 306.0833 | <b>GSGGSG</b>    | 335.1098 | 363.1048 |
| <b>GSGGSGT</b>  | 436.1575 | 464.1524 | <b>SG</b>       | 97.0396  | 125.0346 | <b>SGG</b>       | 154.0611 | 182.0560 |
| <b>SGGS</b>     | 221.0669 | 249.0618 | <b>SGGSG</b>    | 278.0884 | 306.0833 | <b>SGGSGT</b>    | 379.1361 | 407.1310 |
| <b>GG</b>       | 87.0553  | 115.0502 | <b>GGS</b>      | 154.0611 | 182.0560 | <b>GGSG</b>      | 211.0826 | 239.0775 |
| <b>GGSGT</b>    | 312.1302 | 340.1252 | <b>GS</b>       | 97.0396  | 125.0346 | <b>GSG</b>       | 154.0611 | 182.0560 |
| <b>GSGT</b>     | 255.1088 | 283.1037 | <b>SG</b>       | 97.0396  | 125.0346 | <b>SGT</b>       | 198.0873 | 226.0822 |
| <b>GT</b>       | 131.0815 | 159.0764 |                 |          |          |                  |          |          |

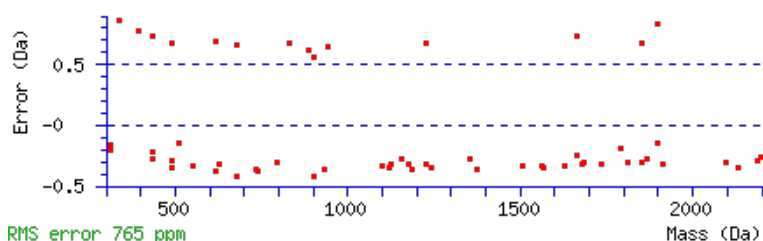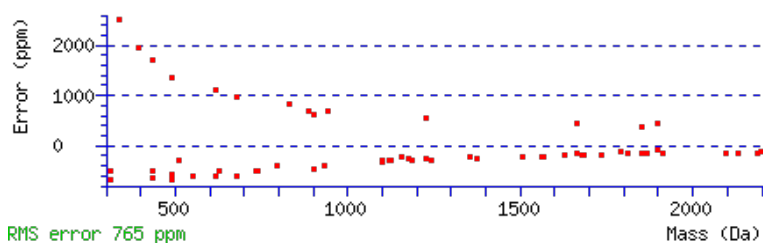

NCBI **BLAST** search of [LGGSCGGQGGGCGGC GGGGCSGGNNGGSGGSGTS](#)

(Parameters: blastp, nr protein database, expect=20000, no filter, PAM30)

Other BLAST [web gateways](#)

#### All matches to this query

| Score | Mr(calc): | Delta   | Sequence                                            |
|-------|-----------|---------|-----------------------------------------------------|
| 150.5 | 2301.6605 | -0.1678 | <a href="#">LGGSCGGQGGGCGGC GGGGCSGGNNGGSGGSGTS</a> |
| 125.3 | 2301.6605 | -0.1678 | <a href="#">LGGSCGGQGGGCGGC GGGGCSGGNNGGSGGSGTS</a> |
| 118.0 | 2301.6605 | -0.1678 | <a href="#">LGGSCGGQGGGCGGC GGGGCSGGNNGGSGGSGTS</a> |
| 81.5  | 2301.6605 | -0.1678 | <a href="#">LGGSCGGQGGGCGGC GGGGCSGGNNGGSGGSGTS</a> |
| 81.5  | 2301.6605 | -0.1678 | <a href="#">LGGSCGGQGGGCGGC GGGGCSGGNNGGSGGSGTS</a> |
| 46.1  | 2301.6605 | -0.1678 | <a href="#">LGGSCGGQGGGCGGC GGGGCSGGNNGGSGGSGTS</a> |
| 30.3  | 2301.6605 | -0.1678 | <a href="#">LGGSCGGQGGGCGGC GGGGCSGGNNGGSGGSGTS</a> |
| 16.1  | 2301.6605 | -0.1678 | <a href="#">TSLGGSCGGQGGGCGGC GGGGCSGGNNGGSGGSG</a> |
| 14.9  | 2301.6605 | -0.1678 | <a href="#">TSLGGSCGGQGGGCGGC GGGGCSGGNNGGSGGSG</a> |
| 12.9  | 2301.6605 | -0.1678 | <a href="#">TSLGGSCGGQGGGCGGC GGGGCSGGNNGGSGGSG</a> |

Mascot: <http://www.matrixscience.com/>

Table S2. Mascot MS/MS Ion search file for peptide with m/z 2302.8

# MASCOT SCIENCE Mascot Search Results

## Peptide View

MS/MS Fragmentation of **LGGSCGGQGGGCGGGCGGGGCSGGNGGSGGSGTSAPDHV**

Found in **McbA\_Psg\_tev**, McbA\_Psg\_tev

Match to Query 1: 2821.092824 from(2822.100100,1+) index(0)

Data file DATA.TXT

Click mouse within plot area to zoom in by factor of two about that point

Or,   to  Da

Label all possible matches  Label matches used for scoring

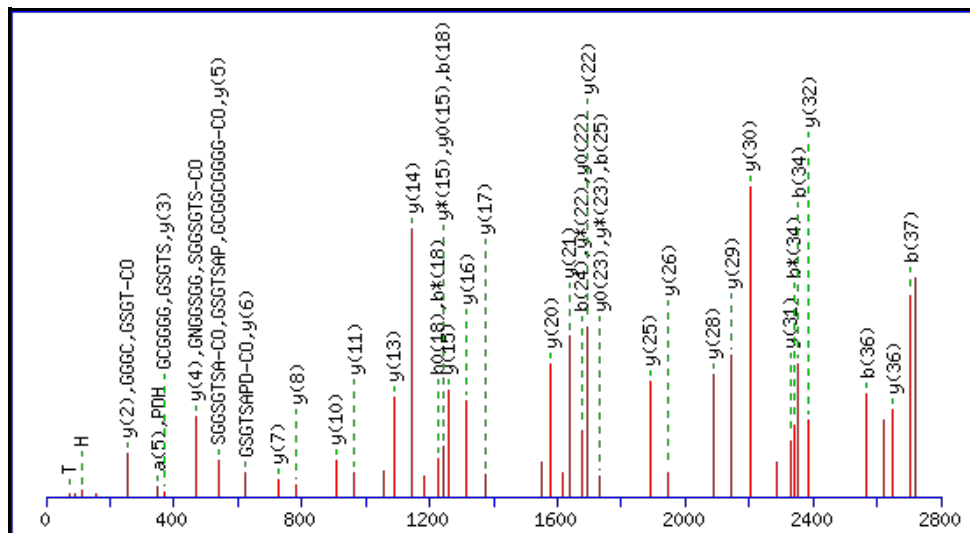

Monoisotopic mass of neutral peptide  $M_r(\text{calc})$ : 2820.9046

### Variable modifications:

S4 : Oxazole S (S)

C5 : Thiazole (C)

C12 : Thiazole (C)

C15 : Thiazole (C)

C20 : Thiazole (C)

S21 : Oxazole S (S)

S27 : Oxazole S (S)

S30 : Oxazole S (S)

Ions Score: 234 **Expect:** 2.4e-021

Matches : 65/889 fragment ions using 42 most intense peaks ([help](#))

| #  | Immon.   | a               | a*       | a <sup>0</sup> | b        | b*       | b <sup>0</sup> | Seq. | y                | y*        | y <sup>0</sup> | #  |
|----|----------|-----------------|----------|----------------|----------|----------|----------------|------|------------------|-----------|----------------|----|
| 1  | 86.0964  | 86.0964         |          |                | 114.0913 |          |                | L    |                  |           |                | 38 |
| 2  | 30.0338  | 143.1179        |          |                | 171.1128 |          |                | G    | 2708.8276        | 2691.8011 | 2690.8170      | 37 |
| 3  | 30.0338  | 200.1394        |          |                | 228.1343 |          |                | G    | <b>2651.8061</b> | 2634.7796 | 2633.7956      | 36 |
| 4  | 40.0182  | 267.1452        |          | 249.1346       | 295.1401 |          | 277.1295       | S    | 2594.7847        | 2577.7581 | 2576.7741      | 35 |
| 5  | 55.9953  | <b>350.1281</b> |          | 332.1176       | 378.1231 |          | 360.1125       | C    | 2527.7789        | 2510.7523 | 2509.7683      | 34 |
| 6  | 30.0338  | 407.1496        |          | 389.1390       | 435.1445 |          | 417.1340       | G    | 2444.7959        | 2427.7694 | 2426.7853      | 33 |
| 7  | 30.0338  | 464.1711        |          | 446.1605       | 492.1660 |          | 474.1554       | G    | <b>2387.7744</b> | 2370.7479 | 2369.7639      | 32 |
| 8  | 101.0709 | 592.2296        | 575.2031 | 574.2191       | 620.2246 | 603.1980 | 602.2140       | Q    | <b>2330.7530</b> | 2313.7264 | 2312.7424      | 31 |
| 9  | 30.0338  | 649.2511        | 632.2246 | 631.2405       | 677.2460 | 660.2195 | 659.2355       | G    | <b>2202.6944</b> | 2185.6678 | 2184.6838      | 30 |
| 10 | 30.0338  | 706.2726        | 689.2460 | 688.2620       | 734.2675 | 717.2409 | 716.2569       | G    | <b>2145.6729</b> | 2128.6464 | 2127.6624      | 29 |
| 11 | 30.0338  | 763.2940        | 746.2675 | 745.2835       | 791.2889 | 774.2624 | 773.2784       | G    | <b>2088.6515</b> | 2071.6249 | 2070.6409      | 28 |
| 12 | 55.9953  | 846.2770        | 829.2505 | 828.2664       | 874.2719 | 857.2454 | 856.2614       | C    | 2031.6300        | 2014.6035 | 2013.6194      | 27 |
| 13 | 30.0338  | 903.2985        | 886.2710 | 885.2870       | 931.2934 | 914.2669 | 913.2829       | C    | <b>1978.6170</b> | 1961.5905 | 1960.6065      | 26 |

|    |          |           |           |           |           |           |           |   |           |           |           |    |
|----|----------|-----------|-----------|-----------|-----------|-----------|-----------|---|-----------|-----------|-----------|----|
| 13 | 30.0338  | 903.2983  | 880.2719  | 883.2879  | 931.2934  | 914.2008  | 913.2828  | G | 1948.0470 | 1931.0203 | 1930.0303 | 20 |
| 14 | 30.0338  | 960.3199  | 943.2934  | 942.3094  | 988.3148  | 971.2883  | 970.3043  | G | 1891.6256 | 1874.5990 | 1873.6150 | 25 |
| 15 | 55.9953  | 1043.3029 | 1026.2764 | 1025.2923 | 1071.2978 | 1054.2713 | 1053.2873 | C | 1834.6041 | 1817.5776 | 1816.5935 | 24 |
| 16 | 30.0338  | 1100.3244 | 1083.2978 | 1082.3138 | 1128.3193 | 1111.2927 | 1110.3087 | G | 1751.6211 | 1734.5946 | 1733.6106 | 23 |
| 17 | 30.0338  | 1157.3458 | 1140.3193 | 1139.3353 | 1185.3407 | 1168.3142 | 1167.3302 | G | 1694.5997 | 1677.5731 | 1676.5891 | 22 |
| 18 | 30.0338  | 1214.3673 | 1197.3407 | 1196.3567 | 1242.3622 | 1225.3357 | 1224.3516 | G | 1637.5782 | 1620.5517 | 1619.5676 | 21 |
| 19 | 30.0338  | 1271.3888 | 1254.3622 | 1253.3782 | 1299.3837 | 1282.3571 | 1281.3731 | G | 1580.5567 | 1563.5302 | 1562.5462 | 20 |
| 20 | 55.9953  | 1354.3717 | 1337.3452 | 1336.3612 | 1382.3666 | 1365.3401 | 1364.3561 | C | 1523.5353 | 1506.5087 | 1505.5247 | 19 |
| 21 | 40.0182  | 1421.3775 | 1404.3510 | 1403.3670 | 1449.3725 | 1432.3459 | 1431.3619 | S | 1440.5523 | 1423.5258 | 1422.5417 | 18 |
| 22 | 30.0338  | 1478.3990 | 1461.3725 | 1460.3884 | 1506.3939 | 1489.3674 | 1488.3834 | G | 1373.5465 | 1356.5199 | 1355.5359 | 17 |
| 23 | 30.0338  | 1535.4205 | 1518.3939 | 1517.4099 | 1563.4154 | 1546.3888 | 1545.4048 | G | 1316.5250 | 1299.4985 | 1298.5145 | 16 |
| 24 | 87.0553  | 1649.4634 | 1632.4368 | 1631.4528 | 1677.4583 | 1660.4318 | 1659.4477 | N | 1259.5036 | 1242.4770 | 1241.4930 | 15 |
| 25 | 30.0338  | 1706.4849 | 1689.4583 | 1688.4743 | 1734.4798 | 1717.4532 | 1716.4692 | G | 1145.4606 |           | 1127.4501 | 14 |
| 26 | 30.0338  | 1763.5063 | 1746.4798 | 1745.4958 | 1791.5012 | 1774.4747 | 1773.4907 | G | 1088.4392 |           | 1070.4286 | 13 |
| 27 | 40.0182  | 1830.5121 | 1813.4856 | 1812.5016 | 1858.5071 | 1841.4805 | 1840.4965 | S | 1031.4177 |           | 1013.4071 | 12 |
| 28 | 30.0338  | 1887.5336 | 1870.5071 | 1869.5230 | 1915.5285 | 1898.5020 | 1897.5180 | G | 964.4119  |           | 946.4013  | 11 |
| 29 | 30.0338  | 1944.5551 | 1927.5285 | 1926.5445 | 1972.5500 | 1955.5234 | 1954.5394 | G | 907.3904  |           | 889.3799  | 10 |
| 30 | 40.0182  | 2011.5609 | 1994.5343 | 1993.5503 | 2039.5558 | 2022.5292 | 2021.5452 | S | 850.3690  |           | 832.3584  | 9  |
| 31 | 30.0338  | 2068.5823 | 2051.5558 | 2050.5718 | 2096.5773 | 2079.5507 | 2078.5667 | G | 783.3632  |           | 765.3526  | 8  |
| 32 | 74.0600  | 2169.6300 | 2152.6035 | 2151.6195 | 2197.6249 | 2180.5984 | 2179.6144 | T | 726.3417  |           | 708.3311  | 7  |
| 33 | 60.0444  | 2256.6620 | 2239.6355 | 2238.6515 | 2284.6570 | 2267.6304 | 2266.6464 | S | 625.2940  |           | 607.2835  | 6  |
| 34 | 44.0495  | 2327.6992 | 2310.6726 | 2309.6886 | 2355.6941 | 2338.6675 | 2337.6835 | A | 538.2620  |           | 520.2514  | 5  |
| 35 | 70.0651  | 2424.7519 | 2407.7254 | 2406.7414 | 2452.7468 | 2435.7203 | 2434.7363 | P | 467.2249  |           | 449.2143  | 4  |
| 36 | 88.0393  | 2539.7789 | 2522.7523 | 2521.7683 | 2567.7738 | 2550.7472 | 2549.7632 | D | 370.1721  |           | 352.1615  | 3  |
| 37 | 110.0713 | 2676.8378 | 2659.8112 | 2658.8272 | 2704.8327 | 2687.8061 | 2686.8221 | H | 255.1452  |           |           | 2  |
| 38 | 72.0808  |           |           |           |           |           |           | V | 118.0863  |           |           | 1  |

| Seq      | ya       | yb       | Seq       | ya       | yb       | Seq        | ya       | yb       |
|----------|----------|----------|-----------|----------|----------|------------|----------|----------|
| GG       | 87.0553  | 115.0502 | GGG       | 154.0611 | 182.0560 | GGSC       | 237.0441 | 265.0390 |
| GGSCG    | 294.0655 | 322.0605 | GGSCGG    | 351.0870 | 379.0819 | GGSCGGQ    | 479.1456 | 507.1405 |
| GGSCGGQG | 536.1670 | 564.1620 | GGSCGGQGG | 593.1885 | 621.1834 | GGSCGGQGGG | 650.2100 | 678.2049 |
| GS       | 97.0396  | 125.0346 | GSC       | 180.0226 | 208.0175 | GSCG       | 237.0441 | 265.0390 |
| GSCGG    | 294.0655 | 322.0605 | GSCGGQ    | 422.1241 | 450.1190 | GSCGGQG    | 479.1456 | 507.1405 |
| GSCGGQGG | 536.1670 | 564.1620 | GSCGGQGGG | 593.1885 | 621.1834 | GSCGGQGGGC | 676.1715 | 704.1664 |
| SC       | 123.0011 | 150.9961 | SCG       | 180.0226 | 208.0175 | SCGG       | 237.0441 | 265.0390 |
| SCGGQ    | 365.1026 | 393.0976 | SCGGQG    | 422.1241 | 450.1190 | SCGGQGG    | 479.1456 | 507.1405 |
| SCGGQGGG | 536.1670 | 564.1620 | SCGGQGGGC | 619.1500 | 647.1449 | SCGGQGGGCG | 676.1715 | 704.1664 |
| CG       | 113.0168 | 141.0117 | CGG       | 170.0383 | 198.0332 | CGGQ       | 298.0968 | 326.0918 |
| CGGQG    | 355.1183 | 383.1132 | CGGQGG    | 412.1398 | 440.1347 | CGGQGGG    | 469.1612 | 497.1561 |
| CGGQGGGC | 552.1442 | 580.1391 | CGGQGGGCG | 609.1657 | 637.1606 | CGGQGGGCGG | 666.1871 | 694.1820 |
| GG       | 87.0553  | 115.0502 | GGQ       | 215.1139 | 243.1088 | GGQG       | 272.1353 | 300.1302 |
| GGQGG    | 329.1568 | 357.1517 | GGQGGG    | 386.1783 | 414.1732 | GGQGGGC    | 469.1612 | 497.1561 |
| GGQGGGCG | 526.1827 | 554.1776 | GGQGGGCGG | 583.2042 | 611.1991 | GGQGGGCGGC | 666.1871 | 694.1820 |
| GQ       | 158.0924 | 186.0873 | GQG       | 215.1139 | 243.1088 | GQGG       | 272.1353 | 300.1302 |
| GQGGG    | 329.1568 | 357.1517 | GQGGGC    | 412.1398 | 440.1347 | GQGGGCG    | 469.1612 | 497.1561 |
| GQGGGCGG | 526.1827 | 554.1776 | GQGGGCGGC | 609.1657 | 637.1606 | GQGGGCGGCG | 666.1871 | 694.1820 |
| OG       | 158.0924 | 186.0873 | OGG       | 215.1139 | 243.1088 | OGGG       | 272.1353 | 300.1302 |

|             |          |          |             |          |          |             |          |          |
|-------------|----------|----------|-------------|----------|----------|-------------|----------|----------|
| QGGGC       | 355.1183 | 383.1132 | QGGGCG      | 412.1398 | 440.1347 | QGGGCGG     | 469.1612 | 497.1561 |
| QGGGCGGC    | 552.1442 | 580.1391 | QGGGCGGCG   | 609.1657 | 637.1606 | QGGGCGGCGG  | 666.1871 | 694.1820 |
| GG          | 87.0553  | 115.0502 | GGG         | 144.0768 | 172.0717 | GGGC        | 227.0597 | 255.0546 |
| GGGCG       | 284.0812 | 312.0761 | GGGCGG      | 341.1027 | 369.0976 | GGGCGGC     | 424.0856 | 452.0805 |
| GGGCGGCG    | 481.1071 | 509.1020 | GGGCGGCGG   | 538.1285 | 566.1235 | GGGCGGCGGG  | 595.1500 | 623.1449 |
| GGGCGGCGGGG | 652.1715 | 680.1664 | GG          | 87.0553  | 115.0502 | GGC         | 170.0383 | 198.0332 |
| GGCG        | 227.0597 | 255.0546 | GGCGG       | 284.0812 | 312.0761 | GGCGGC      | 367.0642 | 395.0591 |
| GGCGGCG     | 424.0856 | 452.0805 | GGCGGCGG    | 481.1071 | 509.1020 | GGCGGCGGG   | 538.1285 | 566.1235 |
| GGCGGCGGGG  | 595.1500 | 623.1449 | GGCGGCGGGGC | 678.1330 | 706.1279 | GC          | 113.0168 | 141.0117 |
| GCG         | 170.0383 | 198.0332 | GCGG        | 227.0597 | 255.0546 | GCGGC       | 310.0427 | 338.0376 |
| GCGGCG      | 367.0642 | 395.0591 | GCGGCGG     | 424.0856 | 452.0805 | GCGGCGGG    | 481.1071 | 509.1020 |
| GCGGCGGGG   | 538.1285 | 566.1235 | GCGGCGGGGC  | 621.1115 | 649.1064 | GCGGCGGGGCS | 688.1173 | 716.1122 |
| CG          | 113.0168 | 141.0117 | CGG         | 170.0383 | 198.0332 | CGGC        | 253.0212 | 281.0161 |
| CGGCG       | 310.0427 | 338.0376 | CGGCGG      | 367.0642 | 395.0591 | CGGCGGG     | 424.0856 | 452.0805 |
| CGGCGGGG    | 481.1071 | 509.1020 | CGGCGGGGC   | 564.0901 | 592.0850 | CGGCGGGGCS  | 631.0959 | 659.0908 |
| CGGCGGGGCSG | 688.1173 | 716.1122 | GG          | 87.0553  | 115.0502 | GGC         | 170.0383 | 198.0332 |
| GGCG        | 227.0597 | 255.0546 | GGCGG       | 284.0812 | 312.0761 | GGCGGG      | 341.1027 | 369.0976 |
| GGCGGGG     | 398.1241 | 426.1190 | GGCGGGGC    | 481.1071 | 509.1020 | GGCGGGGCS   | 548.1129 | 576.1078 |
| GGCGGGGCSG  | 605.1344 | 633.1293 | GGCGGGGCSGG | 662.1558 | 690.1507 | GC          | 113.0168 | 141.0117 |
| GCG         | 170.0383 | 198.0332 | GCGG        | 227.0597 | 255.0546 | GCGGG       | 284.0812 | 312.0761 |
| GCGGGG      | 341.1027 | 369.0976 | GCGGGGC     | 424.0856 | 452.0805 | GCGGGGCS    | 491.0914 | 519.0863 |
| GCGGGGCSG   | 548.1129 | 576.1078 | GCGGGGCSGG  | 605.1344 | 633.1293 | CG          | 113.0168 | 141.0117 |
| CGG         | 170.0383 | 198.0332 | CGGG        | 227.0597 | 255.0546 | CGGGG       | 284.0812 | 312.0761 |
| CGGGGC      | 367.0642 | 395.0591 | CGGGGCS     | 434.0700 | 462.0649 | CGGGGCSG    | 491.0914 | 519.0863 |
| CGGGGCSGG   | 548.1129 | 576.1078 | CGGGGCSGGN  | 662.1558 | 690.1507 | GG          | 87.0553  | 115.0502 |
| GGG         | 144.0768 | 172.0717 | GGGG        | 201.0982 | 229.0931 | GGGGC       | 284.0812 | 312.0761 |
| GGGGCS      | 351.0870 | 379.0819 | GGGGCSG     | 408.1085 | 436.1034 | GGGGCSGG    | 465.1299 | 493.1248 |
| GGGGCSGGN   | 579.1729 | 607.1678 | GGGGCSGGNG  | 636.1943 | 664.1892 | GGGGCSGGNGG | 693.2158 | 721.2107 |
| GG          | 87.0553  | 115.0502 | GGG         | 144.0768 | 172.0717 | GGGC        | 227.0597 | 255.0546 |
| GGGCS       | 294.0655 | 322.0605 | GGGCSG      | 351.0870 | 379.0819 | GGGCSGG     | 408.1085 | 436.1034 |
| GGGCSGGN    | 522.1514 | 550.1463 | GGGCSGGNG   | 579.1729 | 607.1678 | GGGCSGGNGG  | 636.1943 | 664.1892 |
| GG          | 87.0553  | 115.0502 | GGC         | 170.0383 | 198.0332 | GGCS        | 237.0441 | 265.0390 |
| GGCSG       | 294.0655 | 322.0605 | GGCSGG      | 351.0870 | 379.0819 | GGCSGGN     | 465.1299 | 493.1248 |
| GGCSGGNG    | 522.1514 | 550.1463 | GGCSGGNGG   | 579.1729 | 607.1678 | GGCSGGNGGS  | 646.1787 | 674.1736 |
| GC          | 113.0168 | 141.0117 | GCS         | 180.0226 | 208.0175 | GCSG        | 237.0441 | 265.0390 |
| GCSGG       | 294.0655 | 322.0605 | GCSGGN      | 408.1085 | 436.1034 | GCSGGNG     | 465.1299 | 493.1248 |
| GCSGGNGG    | 522.1514 | 550.1463 | GCSGGNGGS   | 589.1572 | 617.1521 | GCSGGNGGSG  | 646.1787 | 674.1736 |
| CS          | 123.0011 | 150.9961 | CSG         | 180.0226 | 208.0175 | CSGG        | 237.0441 | 265.0390 |
| CSGGN       | 351.0870 | 379.0819 | CSGGNG      | 408.1085 | 436.1034 | CSGGNGG     | 465.1299 | 493.1248 |
| CSGGNGGS    | 532.1357 | 560.1307 | CSGGNGGSG   | 589.1572 | 617.1521 | CSGGNGGSGG  | 646.1787 | 674.1736 |
| SG          | 97.0396  | 125.0346 | SGG         | 154.0611 | 182.0560 | SGGN        | 268.1040 | 296.0989 |
| SGGNG       | 325.1255 | 353.1204 | SGGNGG      | 382.1470 | 410.1419 | SGGNGGS     | 449.1528 | 477.1477 |
| SGGNGGSG    | 506.1742 | 534.1691 | SGGNGGSGG   | 563.1957 | 591.1906 | SGGNGGSGGS  | 630.2015 | 658.1964 |
| SGGNGGSGGSG | 687.2230 | 715.2179 | GG          | 87.0553  | 115.0502 | GGN         | 201.0982 | 229.0931 |
| GGNG        | 258.1197 | 286.1146 | GGNGG       | 315.1411 | 343.1361 | GGNGGS      | 382.1470 | 410.1419 |



|                   |                 |                 |                  |                 |                 |                  |                 |                 |
|-------------------|-----------------|-----------------|------------------|-----------------|-----------------|------------------|-----------------|-----------------|
| <b>GGNGGSG</b>    | 439.1684        | <b>467.1633</b> | <b>GGNGGSGG</b>  | 496.1899        | 524.1848        | <b>GGNGGSGGS</b> | 563.1957        | 591.1906        |
| <b>GGNGGSGGSG</b> | 620.2172        | 648.2121        | <b>GN</b>        | 144.0768        | 172.0717        | <b>GNG</b>       | 201.0982        | 229.0931        |
| <b>GNGG</b>       | 258.1197        | 286.1146        | <b>GNGGS</b>     | 325.1255        | 353.1204        | <b>GNGGSG</b>    | 382.1470        | 410.1419        |
| <b>GNGGSGG</b>    | 439.1684        | <b>467.1633</b> | <b>GNGGSGGS</b>  | 506.1742        | 534.1691        | <b>GNGGSGGSG</b> | 563.1957        | 591.1906        |
| <b>GNGGSGGSGT</b> | 664.2434        | 692.2383        | <b>NG</b>        | 144.0768        | 172.0717        | <b>NGG</b>       | 201.0982        | 229.0931        |
| <b>NGGS</b>       | 268.1040        | 296.0989        | <b>NGGSG</b>     | 325.1255        | 353.1204        | <b>NGGSGG</b>    | 382.1470        | 410.1419        |
| <b>NGGSGGS</b>    | 449.1528        | 477.1477        | <b>NGGSGGSG</b>  | 506.1742        | 534.1691        | <b>NGGSGGSGT</b> | 607.2219        | 635.2168        |
| <b>NGGSGGSGTS</b> | 694.2539        | 722.2489        | <b>GG</b>        | 87.0553         | 115.0502        | <b>GGG</b>       | 154.0611        | 182.0560        |
| <b>GGSG</b>       | 211.0826        | 239.0775        | <b>GGSGG</b>     | 268.1040        | 296.0989        | <b>GGSGGS</b>    | 335.1098        | 363.1048        |
| <b>GGSGGSG</b>    | 392.1313        | 420.1262        | <b>GGSGGSGT</b>  | 493.1790        | 521.1739        | <b>GGSGGSGTS</b> | 580.2110        | 608.2059        |
| <b>GGSGGSGTSA</b> | 651.2481        | 679.2430        | <b>GS</b>        | 97.0396         | 125.0346        | <b>GSG</b>       | 154.0611        | 182.0560        |
| <b>GSGG</b>       | 211.0826        | 239.0775        | <b>GSGGS</b>     | 278.0884        | 306.0833        | <b>GSGGSG</b>    | 335.1098        | 363.1048        |
| <b>GSGGSGT</b>    | 436.1575        | 464.1524        | <b>GSGGSGTS</b>  | 523.1895        | 551.1845        | <b>GSGGSGTSA</b> | 594.2267        | 622.2216        |
| <b>GSGGSGTSAP</b> | 691.2794        | 719.2743        | <b>SG</b>        | 97.0396         | 125.0346        | <b>SGG</b>       | 154.0611        | 182.0560        |
| <b>SGGS</b>       | 221.0669        | 249.0618        | <b>SGGSG</b>     | 278.0884        | 306.0833        | <b>SGGSGT</b>    | 379.1361        | 407.1310        |
| <b>SGGSGTS</b>    | <b>466.1681</b> | 494.1630        | <b>SGGSGTSA</b>  | <b>537.2052</b> | 565.2001        | <b>SGGSGTSAP</b> | 634.2580        | 662.2529        |
| <b>GG</b>         | 87.0553         | 115.0502        | <b>GGS</b>       | 154.0611        | 182.0560        | <b>GGSG</b>      | 211.0826        | 239.0775        |
| <b>GGSGT</b>      | 312.1302        | 340.1252        | <b>GGSGTS</b>    | 399.1623        | 427.1572        | <b>GGSGTSA</b>   | 470.1994        | 498.1943        |
| <b>GGSGTSAP</b>   | 567.2522        | 595.2471        | <b>GGSGTSAPD</b> | 682.2791        | 710.2740        | <b>GS</b>        | 97.0396         | 125.0346        |
| <b>GSG</b>        | 154.0611        | 182.0560        | <b>GSGT</b>      | <b>255.1088</b> | 283.1037        | <b>GSGTS</b>     | 342.1408        | <b>370.1357</b> |
| <b>GSGTSA</b>     | 413.1779        | 441.1728        | <b>GSGTSAP</b>   | 510.2307        | <b>538.2256</b> | <b>GSGTSAPD</b>  | <b>625.2576</b> | 653.2525        |
| <b>SG</b>         | 97.0396         | 125.0346        | <b>SGT</b>       | 198.0873        | 226.0822        | <b>SGTS</b>      | 285.1193        | 313.1143        |
| <b>SGTSA</b>      | 356.1565        | 384.1514        | <b>SGTSAP</b>    | 453.2092        | 481.2041        | <b>SGTSAPD</b>   | 568.2362        | 596.2311        |
| <b>GT</b>         | 131.0815        | 159.0764        | <b>GTS</b>       | 218.1135        | 246.1084        | <b>G TSA</b>     | 289.1506        | 317.1456        |
| <b>GTSAP</b>      | 386.2034        | 414.1983        | <b>GTSAPD</b>    | 501.2304        | 529.2253        | <b>GTSAPDH</b>   | 638.2893        | 666.2842        |
| <b>TS</b>         | 161.0921        | 189.0870        | <b>TSA</b>       | 232.1292        | 260.1241        | <b>TSAP</b>      | 329.1819        | 357.1769        |
| <b>TSAPD</b>      | 444.2089        | 472.2038        | <b>TSAPDH</b>    | 581.2678        | 609.2627        | <b>SA</b>        | 131.0815        | 159.0764        |
| <b>SAP</b>        | 228.1343        | 256.1292        | <b>SAPD</b>      | 343.1612        | 371.1561        | <b>SAPDH</b>     | 480.2201        | 508.2150        |
| <b>AP</b>         | 141.1022        | 169.0972        | <b>APD</b>       | 256.1292        | 284.1241        | <b>APDH</b>      | 393.1881        | 421.1830        |
| <b>PD</b>         | 185.0921        | 213.0870        | <b>PDH</b>       | 322.1510        | <b>350.1459</b> | <b>DH</b>        | 225.0982        | 253.0931        |

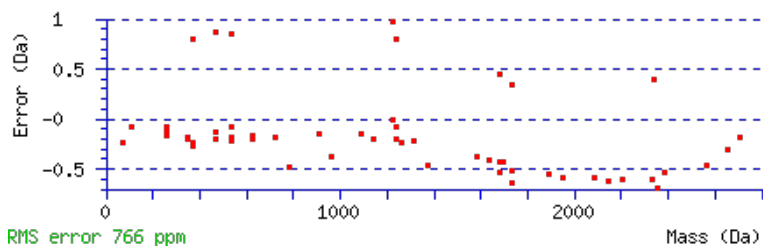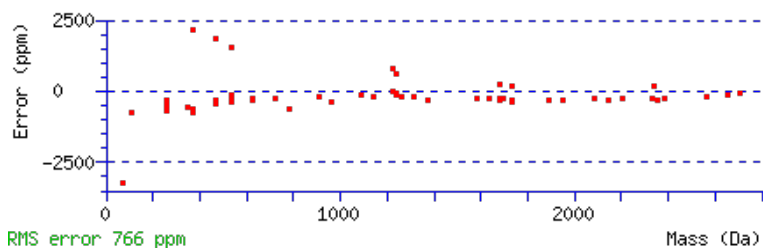

NCBI **BLAST** search of [LGGSCGGQGGGCGGCGGGGCSGGNGGSGGSGTSAPDHV](#)  
 (Parameters: blastp, nr protein database, expect=20000, no filter, PAM30)

Other BLAST [web gateways](#)**All matches to this query**

| Score | Mr(calc): | Delta   | Sequence                                                |
|-------|-----------|---------|---------------------------------------------------------|
| 234.1 | 2820.9046 | 0.1882  | <a href="#">LGGSCGGQGGGCGGC GGGGCSGGNGGSGGSGTSAPDHV</a> |
| 187.4 | 2820.9046 | 0.1882  | <a href="#">LGGSCGGQGGGCGGC GGGGCSGGNGGSGGSGTSAPDHV</a> |
| 152.9 | 2820.9046 | 0.1882  | <a href="#">LGGSCGGQGGGCGGC GGGGCSGGNGGSGGSGTSAPDHV</a> |
| 89.2  | 2820.9046 | 0.1882  | <a href="#">LGGSCGGQGGGCGGC GGGGCSGGNGGSGGSGTSAPDHV</a> |
| 89.2  | 2820.9046 | 0.1882  | <a href="#">LGGSCGGQGGGCGGC GGGGCSGGNGGSGGSGTSAPDHV</a> |
| 58.1  | 2820.9046 | 0.1882  | <a href="#">LGGSCGGQGGGCGGC GGGGCSGGNGGSGGSGTSAPDHV</a> |
| 38.5  | 2820.9046 | 0.1882  | <a href="#">LGGSCGGQGGGCGGC GGGGCSGGNGGSGGSGTSAPDHV</a> |
| 30.2  | 2821.2611 | -0.1683 | <a href="#">LGMVNYFHNAGSICLGSMVQHHCKVH</a>              |
| 20.9  | 2820.9886 | 0.1042  | <a href="#">RQSPLGVGIGGGGGGGGGSCGGQGGGCGGCSNGCSSG</a>   |
| 19.3  | 2821.2611 | -0.1683 | <a href="#">LGMVNYFHNAGSICLGSMVQHHCKVH</a>              |

**Mascot:** <http://www.matrixscience.com/>

Table S3. Mascot MS/MS Ion search file for peptide with m/z 2822.0
